# Supplementary material for: The relation between body fat distribution, plasma concentrations of adipokines and the metabolic syndrome in patients with clinically manifest vascular disease
Source: PubMed Central journal article supplement — Eur J Prev Cardiol. 2018 Jul 27;25(14):1548–57. doi: 10.1177/2047487318790722 (PMC6146311; doi:10.1177/2047487318790722), 2018-07-27
Supplement: Table_s1.pdf [file Table_s1.pdf]

**Table S1.** Relation between adiposity measurements and adipokine concentrations.

|                      | Model | MCP 1            | NGF                    | HGF                    | PAI1                     | MIF                    | Adipsin                | Adiponectin              | Resistin                 | Chemerin                 | SAA1                     | Leptin                 |
|----------------------|-------|------------------|------------------------|------------------------|--------------------------|------------------------|------------------------|--------------------------|--------------------------|--------------------------|--------------------------|------------------------|
| BMI                  | II    | 0,033            | <b>0,133*</b>          | <b>0,130*</b>          | -0,045                   | <b>0,158*</b>          | <b>0,247*</b>          | <b>-0,123*</b>           | -0,081                   | <b>-0,074*</b>           | <b>-0,266*</b>           | <b>0,266*</b>          |
| 3.8kg/m <sup>2</sup> |       | (-0,020 - 0,085) | <b>(0,045 - 0,225)</b> | <b>(0,054 - 0,206)</b> | (-0,109 - 0,019)         | <b>(0,011 - 0,305)</b> | <b>(0,137 - 0,356)</b> | <b>(-0,180 - -0,066)</b> | (-0,194 - 0,033)         | <b>(-0,130 - -0,017)</b> | <b>(-0,386 - -0,146)</b> | <b>(0,207 - 0,324)</b> |
|                      | III   | 0,050            | <b>0,158*</b>          | <b>0,131*</b>          | -0,021                   | <b>0,193*</b>          | <b>0,292*</b>          | <b>-0,094*</b>           | -0,028                   | <b>-0,077*</b>           | <b>-0,274*</b>           | <b>0,282*</b>          |
|                      |       | (-0,005 - 0,104) | <b>(0,063 - 0,254)</b> | <b>(0,051 - 0,210)</b> | (-0,088 - 0,045)         | <b>(0,040 - 0,346)</b> | <b>(0,178 - 0,405)</b> | <b>(-0,153 - -0,036)</b> | (-0,145 - 0,088)         | <b>(-0,135 - -0,018)</b> | <b>(-0,399 - -0,149)</b> | <b>(0,222 - 0,343)</b> |
| WC                   | II    | 0,008            | <b>0,128*</b>          | <b>0,120*</b>          | <b>-0,078*</b>           | 0,128                  | <b>0,224*</b>          | <b>-0,152*</b>           | <b>-0,166*</b>           | <b>-0,102*</b>           | <b>-0,255*</b>           | <b>0,232*</b>          |
| 11.0cm               |       | (-0,048 - 0,063) | <b>(0,032 - 0,224)</b> | <b>(0,040 - 0,200)</b> | <b>(-0,146 - -0,011)</b> | (-0,027 - 0,283)       | <b>(0,109 - 0,339)</b> | <b>(-0,212 - -0,093)</b> | <b>(-0,285 - -0,047)</b> | <b>(-0,161 - -0,042)</b> | <b>(-0,381 - -0,128)</b> | <b>(0,170 - 0,294)</b> |
|                      | III   | 0,021            | <b>0,159*</b>          | <b>0,113*</b>          | -0,045                   | 0,161                  | <b>0,279*</b>          | <b>-0,118*</b>           | -0,098                   | <b>-0,102*</b>           | <b>-0,267*</b>           | <b>0,257*</b>          |
|                      |       | (-0,037 - 0,080) | <b>(0,058 - 0,260)</b> | <b>(0,029 - 0,197)</b> | (-0,115 - 0,025)         | (-0,001 - 0,323)       | <b>(0,159 - 0,399)</b> | <b>(-0,180 - -0,056)</b> | (-0,221 - 0,025)         | <b>(-0,163 - -0,040)</b> | <b>(-0,399 - -0,134)</b> | <b>(0,192 - 0,321)</b> |
| SAT                  | II    | 0,021            | -0,024                 | 0,022                  | <b>-0,084*</b>           | 0,081                  | <b>0,122*</b>          | -0,044                   | -0,100                   | <b>-0,064*</b>           | -0,114                   | 0,053                  |
| 1.4cm                |       | (-0,032 - 0,075) | (-0,118 - 0,070)       | (-0,055 - 0,100)       | <b>(-0,149 - -0,018)</b> | (-0,069 - 0,230)       | <b>(0,010 - 0,233)</b> | (-0,102 - 0,014)         | (-0,215 - 0,015)         | <b>(-0,122 - -0,007)</b> | (-0,236 - 0,009)         | (-0,009 - 0,114)       |
|                      | III   | 0,024            | -0,024                 | 0,025                  | <b>-0,085*</b>           | 0,084                  | <b>0,121*</b>          | -0,043                   | -0,102                   | <b>-0,066*</b>           | -0,111                   | 0,049                  |
|                      |       | (-0,030 - 0,078) | (-0,118 - 0,070)       | (-0,053 - 0,102)       | <b>(-0,150 - -0,021)</b> | (-0,066 - 0,234)       | <b>(0,009 - 0,233)</b> | (-0,100 - 0,014)         | (-0,216 - 0,011)         | <b>(-0,124 - -0,009)</b> | (-0,234 - 0,012)         | (-0,013 - 0,110)       |
| VAT                  | II    | 0,026            | <b>0,153*</b>          | <b>0,181*</b>          | <b>-0,106*</b>           | <b>0,187*</b>          | <b>0,178*</b>          | <b>-0,168*</b>           | -0,079                   | <b>-0,075*</b>           | <b>-0,243*</b>           | <b>0,143*</b>          |
| 2.6cm                |       | (-0,028 - 0,080) | <b>(0,059 - 0,246)</b> | <b>(0,103 - 0,258)</b> | <b>(-0,172 - -0,041)</b> | <b>(0,037 - 0,337)</b> | <b>(0,066 - 0,290)</b> | <b>(-0,226 - -0,111)</b> | (-0,195 - 0,037)         | <b>(-0,132 - -0,017)</b> | <b>(-0,366 - -0,120)</b> | <b>(0,082 - 0,204)</b> |
|                      | III   | 0,038            | <b>0,178*</b>          | <b>0,178*</b>          | <b>-0,081*</b>           | <b>0,216*</b>          | <b>0,217*</b>          | <b>-0,141*</b>           | -0,017                   | <b>-0,072*</b>           | <b>-0,250*</b>           | <b>0,154*</b>          |
|                      |       | (-0,018 - 0,094) | <b>(0,082 - 0,274)</b> | <b>(0,098 - 0,258)</b> | <b>(-0,148 - -0,013)</b> | <b>(0,061 - 0,371)</b> | <b>(0,101 - 0,332)</b> | <b>(-0,200 - -0,082)</b> | (-0,135 - 0,101)         | <b>(-0,131 - -0,012)</b> | <b>(-0,377 - -0,123)</b> | <b>(0,091 - 0,217)</b> |

Results are presented as regression coefficients ( $\beta$ ) and 95% confidence interval (95%CI) per 1 SD increase in adiposity measurements . \* p<0.05

Model II is adjusted for age and gender, Model III is additionally adjusted for current smoking, lipid lowering therapy, history of diabetes type 2 and hsCRP

BMI: body mass index, WC: waist circumference, SAT: subcutaneous adipose tissue VAT: visceral adipose tissue, MCP1: monocyte chemo-attractant protein 1, NGF: nerve growth factor, HGF: hepatic growth factor, PAI1: plasminogen activator inhibitor 1, MIF: migration inhibitory factor, SAA1: serum amyloid A1.
